# Supplementary material
Source: publisher figshare collection journal article supplement (https://frontiersin.figshare.com/ndownloader/files/34201650)
Supplement: Supplementary file 1 [file 34201650]

## Sheet: Samples used for MLST
Table S5: Host plant, collection date and site, and infection status of samples used for the MLST
sample_id	plant	date	site	latitude	longitude	aphid_species	Buchnera	Hamiltonella	Regiella	Serratia	Spiroplama	Rickettsia	Arsenophonus
Y19-0104	Beta_vulgaris	2019-05-22	Birkenstrasse	47.413	8.63103	Aphis_fabae_fabae	1	1	0	0	0	0	0
Y19-0121	Beta_vulgaris	2019-05-22	Birkenstrasse	47.4126	8.63146	Aphis_fabae_fabae	1	1	0	0	0	0	0
Y19-0179	Beta_vulgaris	2019-05-19	Steinmaur	47.4954	8.44303	Aphis_fabae_fabae	1	1	0	0	0	0	0
Y19-0205	Beta_vulgaris	2019-05-26	Steinmaur	47.4909	8.45735	Aphis_fabae_fabae	1	1	0	0	0	0	0
Y19-0264	Beta_vulgaris	2019-05-27	Hermikon	47.3856	8.64029	Aphis_fabae_fabae	1	1	0	0	0	0	0
Y19-0267	Beta_vulgaris	2019-05-27	Hermikon	47.3854	8.64055	Aphis_fabae_fabae	1	1	0	1	0	0	0
Y19-0270	Beta_vulgaris	2019-05-27	Hermikon	47.3854	8.64074	Aphis_fabae_fabae	1	1	0	0	0	0	1
Y19-0273	Beta_vulgaris	2019-05-27	Hermikon	47.3854	8.64113	Aphis_fabae_fabae	1	1	0	0	0	0	0
Y19-0274	Beta_vulgaris	2019-05-27	Hermikon	47.3853	8.64117	Aphis_fabae_fabae	1	1	0	0	0	0	0
Y19-0123	Chenopodium_album	2019-05-22	Birkenstrasse	47.4125	8.6315	Aphis_fabae_fabae	1	1	0	0	0	0	0
Y19-0125	Chenopodium_album	2019-05-22	Birkenstrasse	47.4124	8.63156	Aphis_fabae_fabae	1	1	0	0	0	0	0
Y19-0128	Chenopodium_album	2019-05-22	Birkenstrasse	47.4124	8.63162	Aphis_fabae_fabae	1	1	0	0	0	0	0
Y19-0182	Chenopodium_album	2019-05-19	Steinmaur	47.4982	8.44427	Aphis_fabae_fabae	1	1	0	0	0	0	0
Y19-0183	Chenopodium_album	2019-05-19	Steinmaur	47.4981	8.44411	Aphis_fabae_fabae	1	1	0	0	0	1	0
Y19-0206	Chenopodium_album	2019-05-26	Steinmaur	47.4909	8.45571	Aphis_fabae_fabae	1	1	0	0	0	0	0
Y19-0065	Hedera_helix	2019-05-14	Neugutstrasse	47.406	8.60265	Aphis_hederae	1	1	0	0	0	0	0
Y19-0220	Hedera_helix	2019-06-02	Dielsdorf	47.4828	8.45569	Aphis_hederae	1	1	0	0	0	0	0
Y19-0221	Hedera_helix	2019-06-02	Dielsdorf	47.4833	8.45499	Aphis_hederae	1	1	0	0	0	0	0
Y19-0222	Hedera_helix	2019-06-02	Dielsdorf	47.4839	8.4552	Aphis_hederae	1	1	0	1	0	0	0
Y19-0224	Hedera_helix	2019-06-02	Steinmaur	47.4883	8.45144	Aphis_hederae	1	1	0	0	0	0	0
Y19-0042	Rubus_fruticosus	2019-05-13	Eawag	47.4057	8.61414	Aphis_ruborum	1	1	0	0	0	0	1
Y19-0061	Rubus_fruticosus	2019-05-14	Neugutstrasse	47.4058	8.6029	Aphis_ruborum	1	1	0	0	0	0	1
Y19-0187	Rubus_fruticosus	2019-05-19	Steinmaur	47.4941	8.44389	Aphis_ruborum	1	1	0	0	0	0	1
Y19-0189	Rubus_fruticosus	2019-05-19	Steinmaur	47.4926	8.44557	Aphis_ruborum	1	1	0	0	0	1	1
Y19-0225	Rubus_fruticosus	2019-06-02	Steinmaur	47.4889	8.45196	Aphis_ruborum	1	1	0	0	0	0	0
Y19-0229	Rubus_fruticosus	2019-06-02	Steinmaur	47.4903	8.44679	Aphis_ruborum	1	1	0	0	0	0	0
Y19-0231	Rubus_fruticosus	2019-06-16	Niederhasli	47.4917	8.47402	Aphis_ruborum	1	1	0	0	0	0	1
Y19-0258	Rubus_fruticosus	2019-05-27	Hermikon	47.384	8.62678	Aphis_ruborum	1	1	0	1	0	0	1
Y19-0259	Rubus_fruticosus	2019-05-27	Hermikon	47.384	8.62672	Aphis_ruborum	1	1	0	1	0	0	1
Y19-0262	Rubus_fruticosus	2019-05-27	Hermikon	47.3841	8.62662	Aphis_ruborum	1	1	0	0	0	0	1
Y19-0263	Rubus_fruticosus	2019-05-27	Hermikon	47.3843	8.62575	Aphis_ruborum	1	1	0	0	0	0	1
Y19-0016	Urtica_dioica	2019-05-13	Eawag	47.4044	8.61083	Aphis_urticata	1	1	0	1	0	0	0
Y19-0018	Urtica_dioica	2019-05-13	Eawag	47.4044	8.61095	Aphis_urticata	1	1	0	1	0	0	0
Y19-0023	Urtica_dioica	2019-05-13	Eawag	47.4047	8.61151	Aphis_urticata	1	1	0	1	0	0	0
Y19-0025	Urtica_dioica	2019-05-13	Eawag	47.4048	8.61156	Aphis_urticata	1	1	0	1	0	0	0
Y19-0032	Urtica_dioica	2019-05-13	Eawag	47.4053	8.61281	Aphis_urticata	1	1	0	0	0	0	0
Y19-0033	Urtica_dioica	2019-05-13	Eawag	47.4055	8.61301	Aphis_urticata	1	1	0	1	0	0	0
Y19-0034	Urtica_dioica	2019-05-13	Eawag	47.4054	8.61283	Aphis_urticata	1	1	0	1	0	0	0
Y19-0035	Urtica_dioica	2019-05-13	Eawag	47.4054	8.61305	Aphis_urticata	1	1	0	0	0	0	0
Y19-0039	Urtica_dioica	2019-05-13	Eawag	47.4055	8.61314	Aphis_urticata	1	1	0	1	0	0	0
Y19-0060	Urtica_dioica	2019-05-14	Neugutstrasse	47.405	8.60027	Aphis_urticata	1	1	0	1	0	0	0
Y19-0076	Urtica_dioica	2019-05-21	Zwingarten	47.4059	8.61846	Aphis_urticata	1	1	0	1	0	0	0
Y19-0078	Urtica_dioica	2019-05-21	Zwingarten	47.4059	8.61876	Aphis_urticata	1	1	0	0	0	0	0
Y19-0080	Urtica_dioica	2019-05-21	Zwingarten	47.406	8.61897	Aphis_urticata	1	1	0	1	0	0	0
